# Supplementary material
Source: HighWire-hosted journal article supplement (https://bmjopen.bmj.com/content/15/3/e091323)
Supplement: inline-supplementary-material-1 [file inline-supplementary-material-1.pdf]

PRISMA-P 2015 Checklist for Scoping review protocol: Mapping the current knowledge on leukocytes in human breastmilk

This checklist has been adapted for use with protocol submissions to *Systematic Reviews* from Table 3 in Moher D et al: Preferred reporting items for systematic review and meta-analysis protocols (PRISMA-P) 2015 statement. *Systematic Reviews* 2015 4:1

| Section/topic              | #  | Checklist item                                                                                                                                                                                  | Information reported                                                      |                                     | Line number(s) |
|----------------------------|----|-------------------------------------------------------------------------------------------------------------------------------------------------------------------------------------------------|---------------------------------------------------------------------------|-------------------------------------|----------------|
|                            |    |                                                                                                                                                                                                 | Yes                                                                       | No                                  |                |
| ADMINISTRATIVE INFORMATION |    |                                                                                                                                                                                                 |                                                                           |                                     |                |
| Title                      |    |                                                                                                                                                                                                 |                                                                           |                                     |                |
| Identification             | 1a | Identify the report as a protocol of a systematic review<br><br>Our protocol is designed specifically to undertake a scoping review                                                             | <input checked="" type="checkbox"/> Error!<br>Bookmark<br>not<br>defined. | <input type="checkbox"/>            | 1              |
| Update                     | 1b | If the protocol is for an update of a previous systematic review, identify as such                                                                                                              | <input type="checkbox"/>                                                  | <input checked="" type="checkbox"/> | NA             |
| Registration               | 2  | If registered, provide the name of the registry (e.g., PROSPERO) and registration number in the Abstract                                                                                        | <input checked="" type="checkbox"/>                                       | <input type="checkbox"/>            | 55-56          |
| Authors                    |    |                                                                                                                                                                                                 |                                                                           |                                     |                |
| Contact                    | 3a | Provide name, institutional affiliation, and e-mail address of all protocol authors; provide physical mailing address of corresponding author                                                   | <input checked="" type="checkbox"/>                                       | <input type="checkbox"/>            | 3-28           |
| Contributions              | 3b | Describe contributions of protocol authors and identify the guarantor of the review                                                                                                             | <input checked="" type="checkbox"/>                                       | <input type="checkbox"/>            | 233-238        |
| Amendments                 | 4  | If the protocol represents an amendment of a previously completed or published protocol, identify as such and list changes; otherwise, state plan for documenting important protocol amendments | <input type="checkbox"/>                                                  | <input checked="" type="checkbox"/> | NA             |
| Support                    |    |                                                                                                                                                                                                 |                                                                           |                                     |                |
| Sources                    | 5a | Indicate sources of financial or other support for the review                                                                                                                                   | <input checked="" type="checkbox"/>                                       | <input type="checkbox"/>            | 229-232        |
| Sponsor                    | 5b | Provide name for the review funder and/or sponsor                                                                                                                                               | <input type="checkbox"/>                                                  | <input checked="" type="checkbox"/> | NA             |
| Role of                    | 5c | Describe roles of funder(s), sponsor(s), and/or institution(s), if any, in developing the protocol                                                                                              | <input type="checkbox"/>                                                  | <input checked="" type="checkbox"/> | NA             |

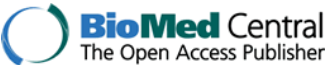

| Section/topic                      | #   | Checklist item                                                                                                                                                                                                                                                                     | Information reported                |                                     | Line number(s)   |
|------------------------------------|-----|------------------------------------------------------------------------------------------------------------------------------------------------------------------------------------------------------------------------------------------------------------------------------------|-------------------------------------|-------------------------------------|------------------|
|                                    |     |                                                                                                                                                                                                                                                                                    | Yes                                 | No                                  |                  |
| sponsor/funder                     |     |                                                                                                                                                                                                                                                                                    |                                     |                                     |                  |
| INTRODUCTION                       |     |                                                                                                                                                                                                                                                                                    |                                     |                                     |                  |
| Rationale                          | 6   | Describe the rationale for the review in the context of what is already known                                                                                                                                                                                                      | <input checked="" type="checkbox"/> | <input type="checkbox"/>            | 90-99            |
| Objectives                         | 7   | Provide an explicit statement of the question(s) the review will address with reference to participants, interventions, comparators, and outcomes (PICO)                                                                                                                           | <input checked="" type="checkbox"/> | <input type="checkbox"/>            | 108-110, 131-133 |
|                                    |     | We used Population, Concepts, Context (PCC) instead                                                                                                                                                                                                                                |                                     |                                     |                  |
| METHODS                            |     |                                                                                                                                                                                                                                                                                    |                                     |                                     |                  |
| Eligibility criteria               | 8   | Specify the study characteristics (e.g., PICO, study design, setting, time frame) and report characteristics (e.g., years considered, language, publication status) to be used as criteria for eligibility for the review<br><br>Inclusion criteria was described according to PCC | <input checked="" type="checkbox"/> | <input type="checkbox"/>            | 131-133          |
| Information sources                | 9   | Describe all intended information sources (e.g., electronic databases, contact with study authors, trial registers, or other grey literature sources) with planned dates of coverage                                                                                               | <input checked="" type="checkbox"/> | <input type="checkbox"/>            | 123-124          |
| Search strategy                    | 10  | Present draft of search strategy to be used for at least one electronic database, including planned limits, such that it could be repeated                                                                                                                                         | <input checked="" type="checkbox"/> | <input type="checkbox"/>            | 138-157          |
| STUDY RECORDS                      |     |                                                                                                                                                                                                                                                                                    |                                     |                                     |                  |
| Data management                    | 11a | Describe the mechanism(s) that will be used to manage records and data throughout the review                                                                                                                                                                                       | <input checked="" type="checkbox"/> | <input type="checkbox"/>            | 171-183          |
| Selection process                  | 11b | State the process that will be used for selecting studies (e.g., two independent reviewers) through each phase of the review (i.e., screening, eligibility, and inclusion in meta-analysis)                                                                                        | <input checked="" type="checkbox"/> | <input type="checkbox"/>            | 159-169          |
| Data collection process            | 11c | Describe planned method of extracting data from reports (e.g., piloting forms, done independently, in duplicate), any processes for obtaining and confirming data from investigators                                                                                               | <input checked="" type="checkbox"/> | <input type="checkbox"/>            | 171-183          |
| Data items                         | 12  | List and define all variables for which data will be sought (e.g., PICO items, funding sources), any pre-planned data assumptions and simplifications                                                                                                                              | <input checked="" type="checkbox"/> | <input type="checkbox"/>            | Table 3          |
| Outcomes and prioritization        | 13  | List and define all outcomes for which data will be sought, including prioritization of main and additional outcomes, with rationale                                                                                                                                               | <input type="checkbox"/>            | <input checked="" type="checkbox"/> | NA               |
| Risk of bias in individual studies | 14  | Describe anticipated methods for assessing risk of bias of individual studies, including whether this will be done at the outcome or study level, or both; state how this information will be used in data synthesis                                                               | <input type="checkbox"/>            | <input checked="" type="checkbox"/> | NA               |

| Section/topic                     | #   | Checklist item                                                                                                                                                                                                                              | Information reported                |                                     | Line number(s) |
|-----------------------------------|-----|---------------------------------------------------------------------------------------------------------------------------------------------------------------------------------------------------------------------------------------------|-------------------------------------|-------------------------------------|----------------|
|                                   |     |                                                                                                                                                                                                                                             | Yes                                 | No                                  |                |
| DATA                              |     |                                                                                                                                                                                                                                             |                                     |                                     |                |
| Synthesis                         | 15a | Describe criteria under which study data will be quantitatively synthesized                                                                                                                                                                 | <input checked="" type="checkbox"/> | <input type="checkbox"/>            | 186-189        |
|                                   | 15b | If data are appropriate for quantitative synthesis, describe planned summary measures, methods of handling data, and methods of combining data from studies, including any planned exploration of consistency (e.g., $I^2$ , Kendall's tau) | <input type="checkbox"/>            | <input checked="" type="checkbox"/> | NA             |
|                                   | 15c | Describe any proposed additional analyses (e.g., sensitivity or subgroup analyses, meta-regression)                                                                                                                                         | <input type="checkbox"/>            | <input checked="" type="checkbox"/> | NA             |
|                                   | 15d | If quantitative synthesis is not appropriate, describe the type of summary planned                                                                                                                                                          | <input checked="" type="checkbox"/> | <input type="checkbox"/>            | 185-193        |
| Meta-bias(es)                     | 16  | Specify any planned assessment of meta-bias(es) (e.g., publication bias across studies, selective reporting within studies)                                                                                                                 | <input type="checkbox"/>            | <input checked="" type="checkbox"/> | NA             |
| Confidence in cumulative evidence | 17  | Describe how the strength of the body of evidence will be assessed (e.g., GRADE)                                                                                                                                                            | <input checked="" type="checkbox"/> | <input type="checkbox"/>            | 195-203        |
